# Supplementary material for: Structural Basis for the Immunogenicity of the C-Terminus of VP1 of Echovirus 3 Revealed by the Binding of a Neutralizing Antibody
Source: MDPI journal article supplement (doi:10.3390/v14112322), 2022-10-22
Supplement: s1 [file s1]

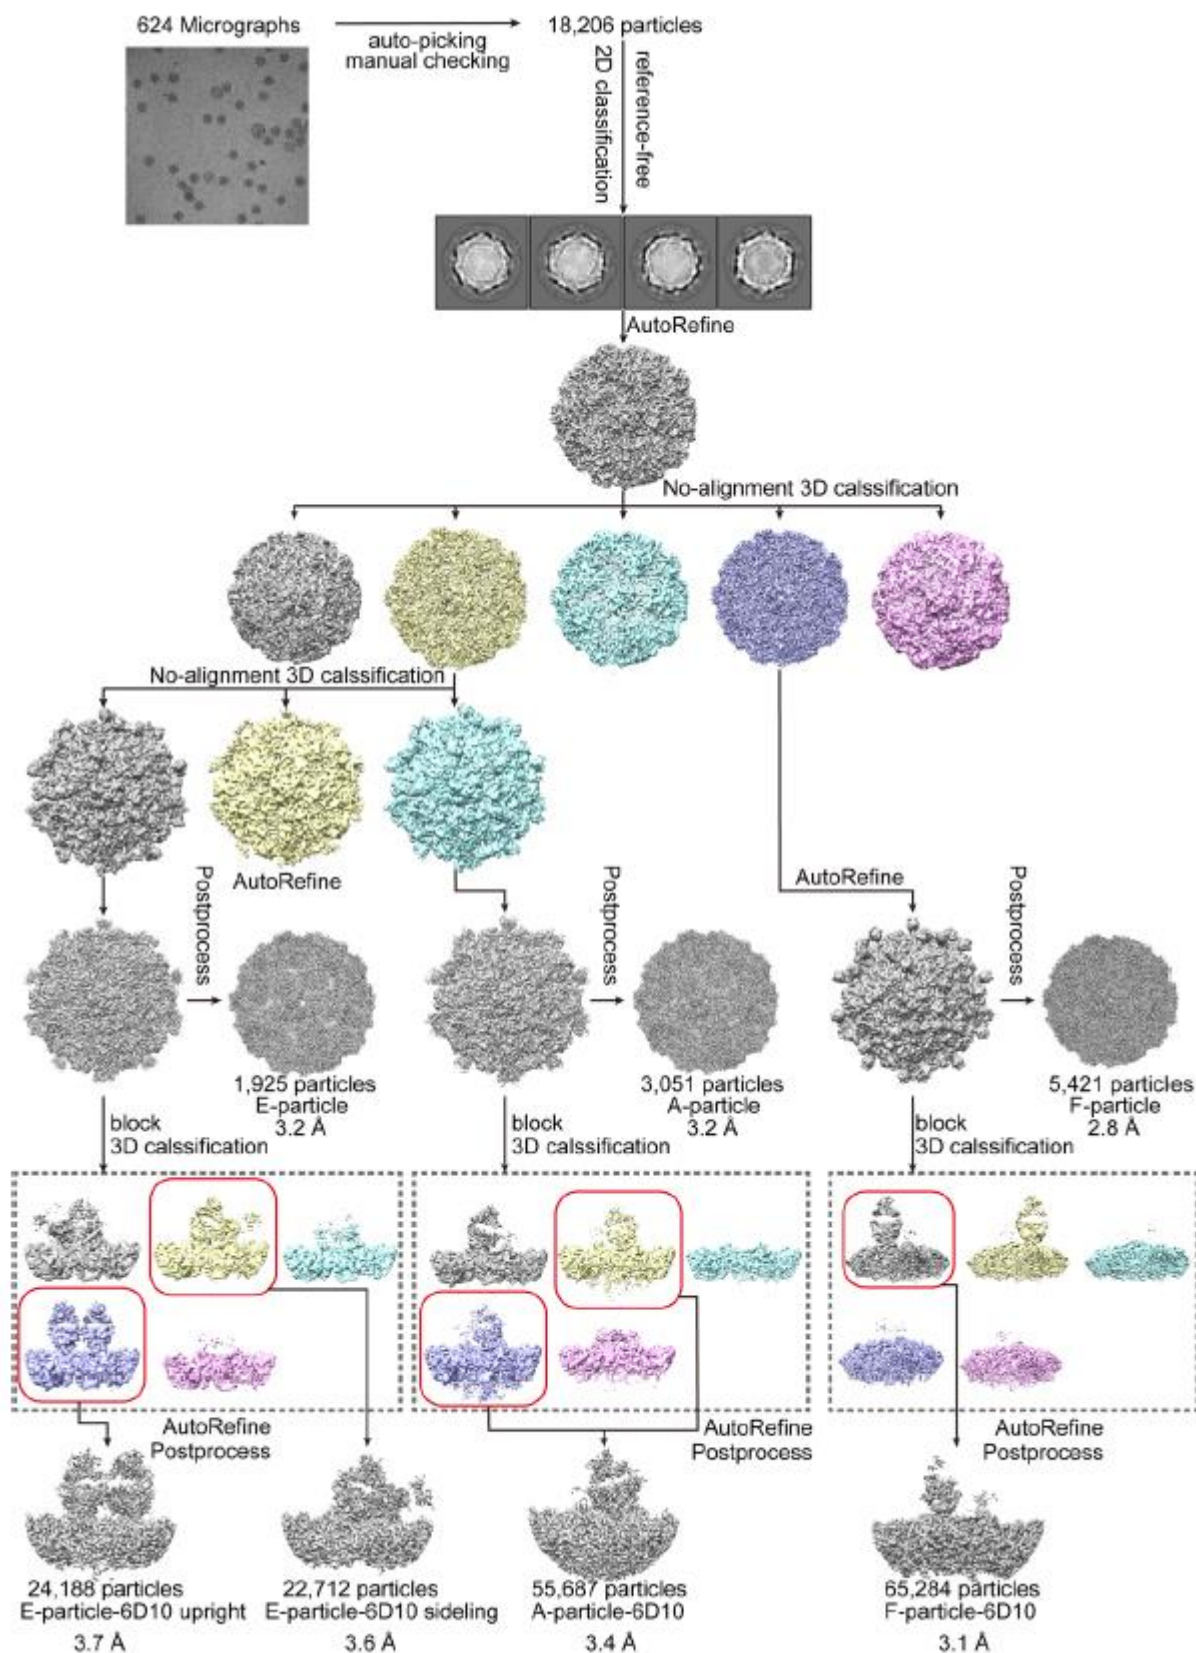

**Figure S1.** Workflow of data processing for cryo-EM single-particle analysis of Enterovirus 3 (E3) with its neutralizing antibody 6D10. The gray dotted squares indicate the models in one group generated by BLOCK analysis. The best maps selected for final auto-refine and postprocess were shown in the red squares.

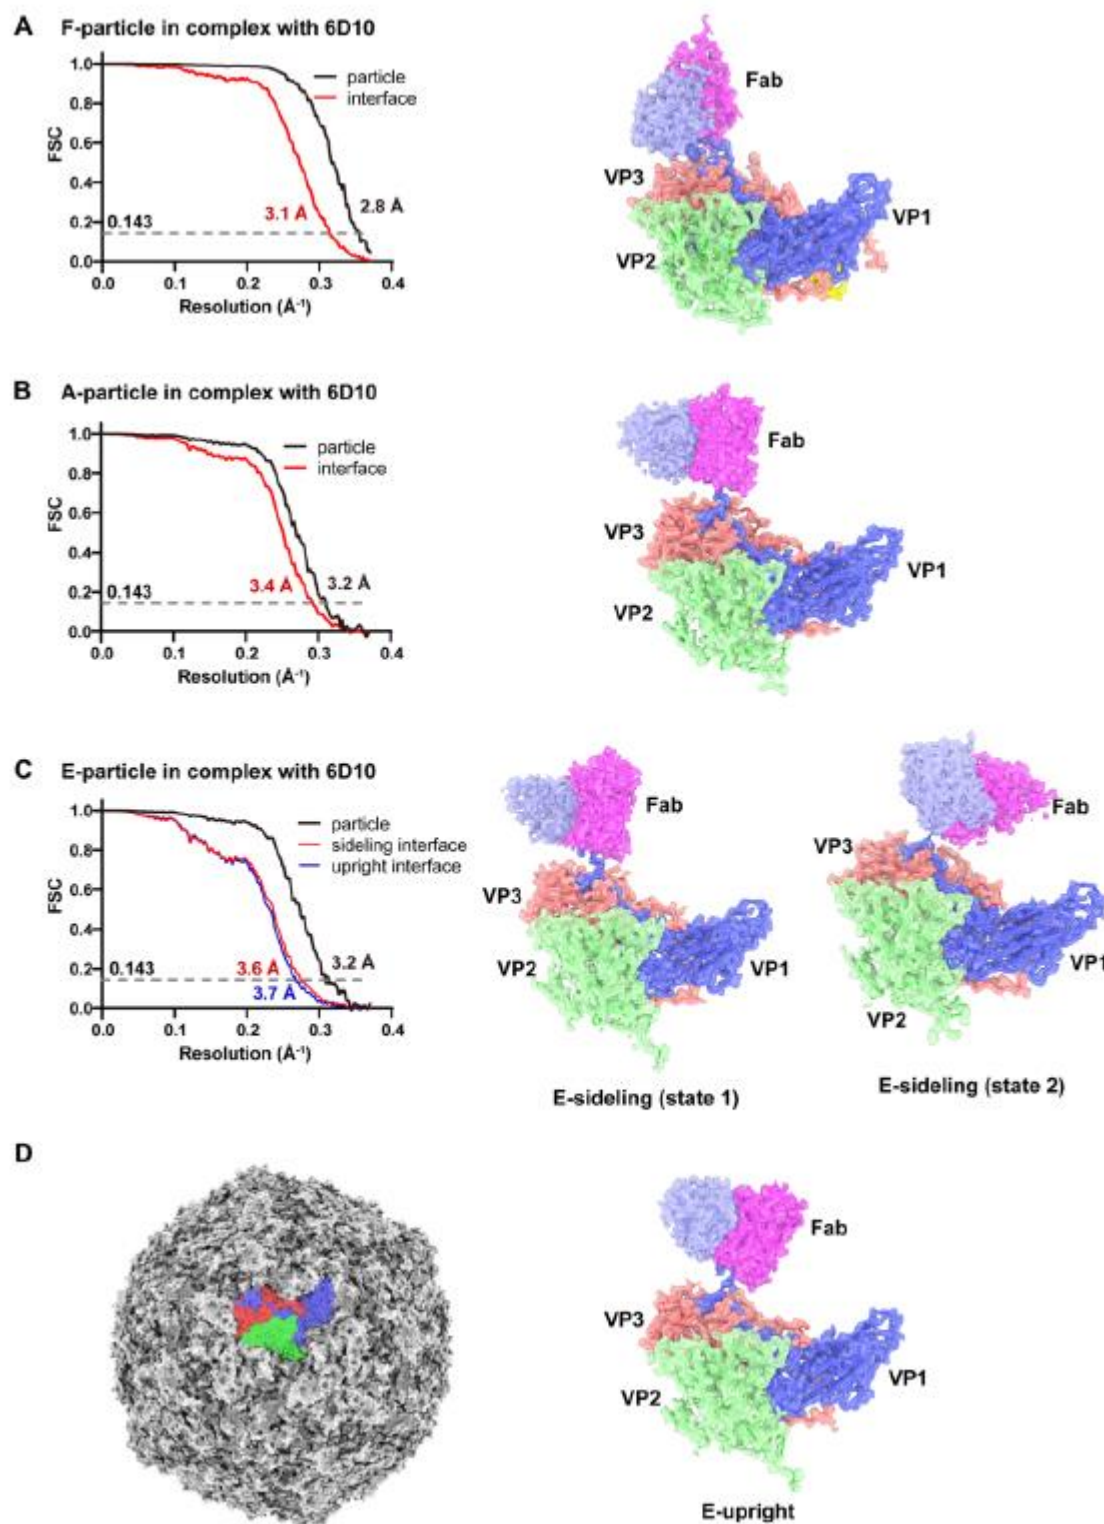

**Figure S2.** A–C. Cross-validation FSC curves for map-to-model fitting and the interfaces of E3 F-, A-, and E-particles with 6D10, respectively. VP1, VP2, and VP3 from one protomer are colored blue, green and red, respectively. Heavy chain and light chain of 6D10 are shown in purple and magenta, respectively. D. Surface representation of the E3 particle. A protomer located at the two-fold axes is highlight in the same color scheme.

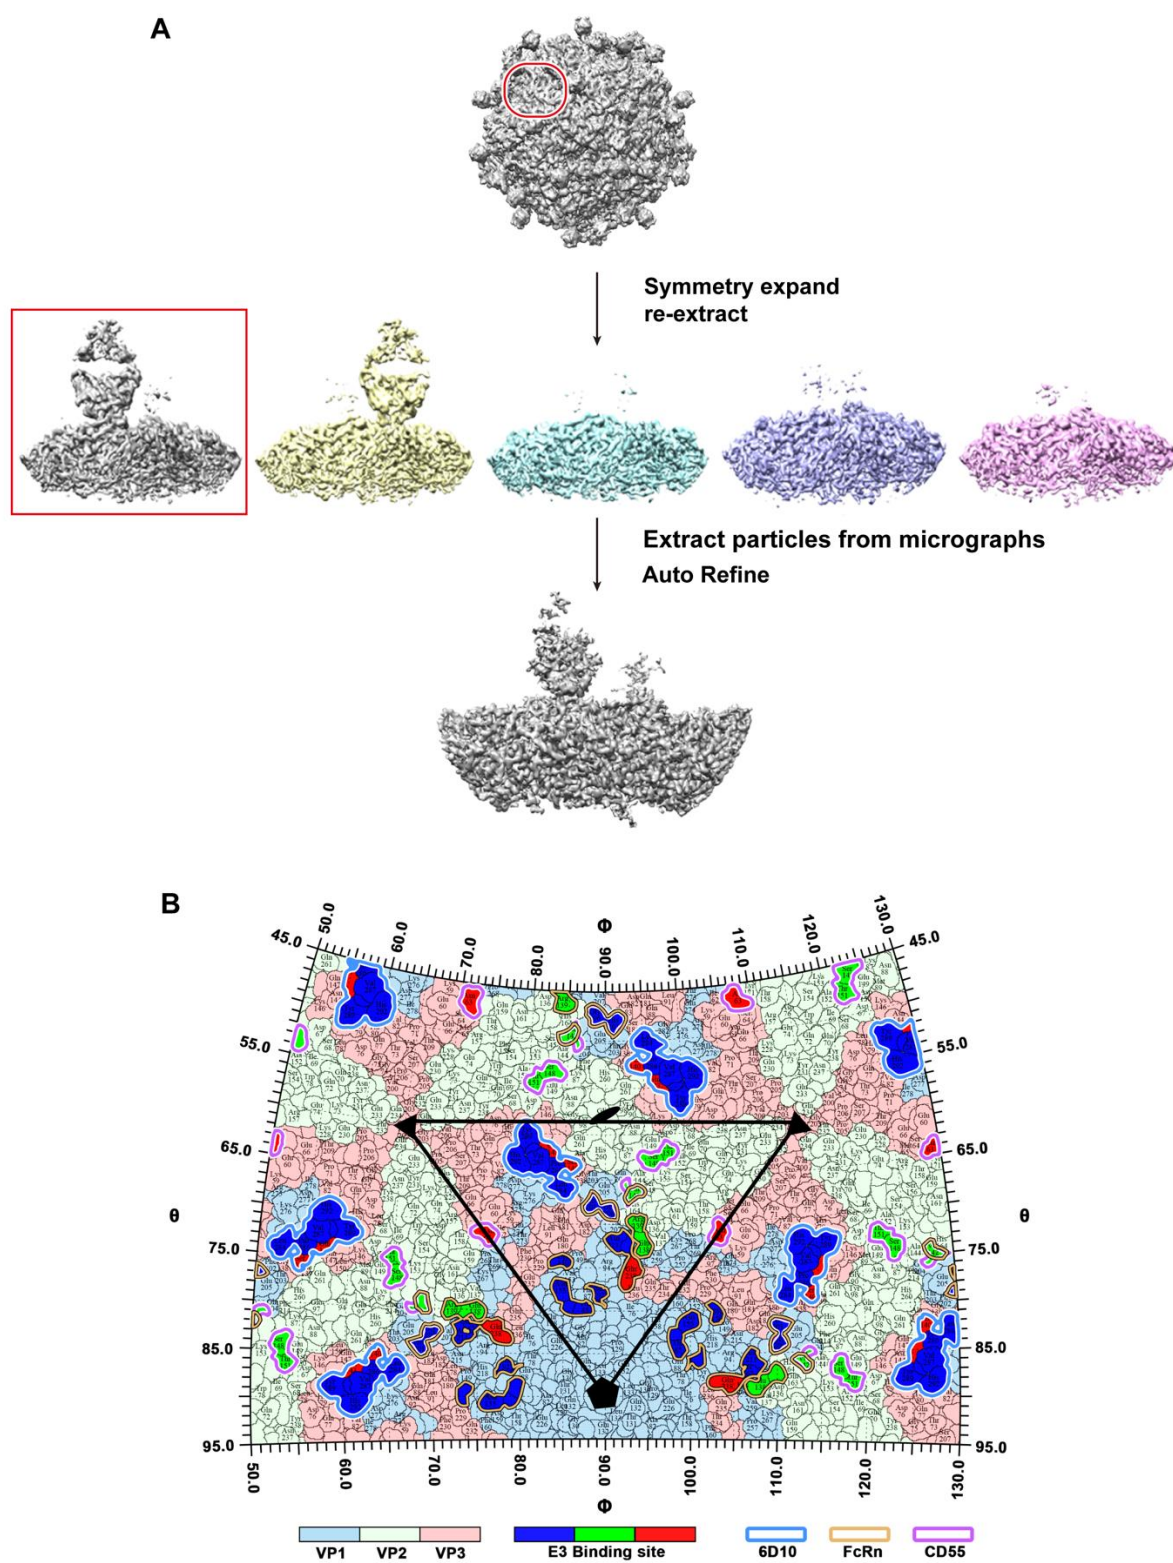

**Figure S3.** A. Data processing of E3-6D10 by BLOCK to improve the density at the interface. The red cycle indicates the unclear density of 6D10 before performing BLOCK. The best class obtained by BLOCK was highlighted by a red square, which was extracted again from the E3-6D10 particles, and further refined. B. The 6D10 footprints on the E3 surface. A two-dimensional projection of the E3 surface was produced using RIVEM. Residues of VP1, VP2, VP3 are colored in pale blue, pale green, pale pink, respectively. The residues involved in binding of E3 to 6D10 are colored blue,



green and red, respectively. The footprints of 6D10 and the receptors CD55 and FcRn are rimmed in light blue, purple and dark yellow, respectively. The triangles and five-pointed star indicate the two-, three-, and five-fold icosahedral symmetry axes.

**Supplementary Table 1. Interactions of E3 with 6D10 ( $d < 4 \text{ \AA}$ )**

| E3 F-particle           |            |          | 6D10          |             |
|-------------------------|------------|----------|---------------|-------------|
| Location                | Domain     | Residues | Light chain   | Heavy chain |
| VP1                     | C-terminus | L284     | Y98           | -           |
|                         |            | P286     | Y98, Y38, Y31 | -           |
|                         |            | V287     | Y98           | -           |
|                         |            | Y289     | -             | N31         |
|                         |            | H292     | -             | D57, N55    |
| VP3                     | EF loop    | S140     | S32           | -           |
|                         |            | Q143     | Y31           | -           |
| E3 A-particle           |            |          | 6D10          |             |
| Location                | Domain     | Residues | Light chain   | Heavy chain |
| VP1                     | C-terminus | L284     | Y98           | -           |
|                         |            | P286     | Y98, Y31      | -           |
|                         |            | V287     | -             | T103        |
|                         |            | H292     | -             | D57, N55    |
| VP3                     | GH loop    | Y184     | Y31, S32, S33 | -           |
| E3 E-upright            |            |          | 6D10          |             |
| Location                | Domain     | Residues | Light chain   | Heavy chain |
| VP1                     | C-terminus | L284     | Y98           | -           |
|                         |            | P286     | Y98, Y31      | -           |
|                         |            | V287     | Y98           | -           |
|                         |            | H292     | -             | D57, N55    |
| VP3                     | GH loop    | Y184     | Y31, S32      | -           |
|                         |            | D182     | S32           | -           |
| E3 E-sideling (state 1) |            |          | 6D10          |             |
| Location                | Domain     | Residues | Light chain   | Heavy chain |
| VP1                     | C-terminus | P286     | Y98, Y38, Y31 | -           |
|                         |            | V287     | Y98           | T103        |
|                         |            | H292     | -             | D57, N55    |
| E3 E-sideling (state 2) |            |          | 6D10          |             |
| Location                | Domain     | Residues | Light chain   | Heavy chain |
| VP1                     | C-terminus | K276     | -             | Q62         |
|                         |            | L284     | Y98           | -           |
|                         |            | P286     | Y98, Y38, Y31 | -           |
|                         |            | V287     | Y98           | -           |
|                         |            | D291     | -             | D57         |
|                         |            | H292     | -             | D57         |
| VP3                     | GH loop    | Y184     | Q27           | -           |

Supplementary Table 2. Cryo-EM data collection and refinement statistics

|                                                            | E3 F-particle<br>with 6D10<br>(overall) | E3 A-particle<br>with 6D10<br>(overall) | E3 E-particle<br>with 6D10<br>(overall) | E3 F-particle<br>with 6D10<br>(interface) | E3 A-particle<br>with 6D10<br>(interface) | E3 E-particle with<br>6D10 (upright<br>interface) | E3 E-particle with<br>6D10 (sideling<br>interface) |
|------------------------------------------------------------|-----------------------------------------|-----------------------------------------|-----------------------------------------|-------------------------------------------|-------------------------------------------|---------------------------------------------------|----------------------------------------------------|
| <b>Data collection</b>                                     |                                         |                                         |                                         |                                           |                                           |                                                   |                                                    |
| Voltage (kV)                                               |                                         |                                         |                                         | 300                                       |                                           |                                                   |                                                    |
| Microscope                                                 |                                         |                                         |                                         | FEI Titan Krios                           |                                           |                                                   |                                                    |
| Camera                                                     |                                         |                                         |                                         | K2 (Gatan)                                |                                           |                                                   |                                                    |
| Electron exposure (e <sup>-</sup> /Å <sup>2</sup> )        |                                         |                                         |                                         | 30                                        |                                           |                                                   |                                                    |
| Number of frames<br>collected per micrograph               |                                         |                                         |                                         | 25                                        |                                           |                                                   |                                                    |
| Automation software                                        |                                         |                                         |                                         | SerialEM                                  |                                           |                                                   |                                                    |
| Defocus range (μm)                                         |                                         |                                         |                                         | −1.2 to −2.5                              |                                           |                                                   |                                                    |
| Pixel size (Å)                                             |                                         |                                         |                                         | 1.35                                      |                                           |                                                   |                                                    |
| <b>Overall map processing</b>                              |                                         |                                         |                                         |                                           |                                           |                                                   |                                                    |
| Micrographs used                                           | 624                                     | 624                                     | 624                                     | 624                                       | 624                                       | 624                                               | 624                                                |
| Symmetry imposed                                           | I3                                      | I3                                      | I3                                      | C1                                        | C1                                        | C1                                                | C1                                                 |
| Initial particle images                                    | 18,206                                  | 18,206                                  | 18,206                                  | 325,260                                   | 183,060                                   | 115,500                                           | 115,500                                            |
| Final particle images                                      | 5,421                                   | 3,051                                   | 1,925                                   | 65,284                                    | 55,687                                    | 24,188                                            | 22,712                                             |
| Resolution at 0.143 FSC<br>of masked reconstruction<br>(Å) | 2.8                                     | 3.2                                     | 3.2                                     | 3.1                                       | 3.4                                       | 3.7                                               | 3.6                                                |
| Map sharpening B factor<br>(Å <sup>2</sup> )               | −92.85                                  | −113.43                                 | −90.31                                  | −94.63                                    | −99.28                                    | −122.03                                           | −96.55                                             |
| <b>Local map refinement</b>                                |                                         |                                         |                                         |                                           |                                           |                                                   |                                                    |
| Initial model used (PDB<br>code)                           |                                         |                                         |                                         |                                           |                                           |                                                   |                                                    |
| Refinement package                                         | -                                       | -                                       | -                                       | Phenix v1.19                              | Phenix v1.19                              | Phenix v1.19                                      | Phenix v1.19                                       |
| Model composition                                          |                                         |                                         |                                         |                                           |                                           |                                                   |                                                    |
| Non-hydrogen<br>atoms                                      | -                                       | -                                       | -                                       | 8,322                                     | 7,453                                     | 7,474                                             | 14,924                                             |
| Protein residues                                           | -                                       | -                                       | -                                       | 1,060                                     | 949                                       | 952                                               | 1,901                                              |
| R.m.s. deviations                                          |                                         |                                         |                                         |                                           |                                           |                                                   |                                                    |
| Bond lengths (Å)                                           | -                                       | -                                       | -                                       | 0.004                                     | 0.004                                     | 0.005                                             | 0.003                                              |
| Bond angles (°)                                            | -                                       | -                                       | -                                       | 0.58                                      | 0.62                                      | 0.68                                              | 0.633                                              |
| B factors (Å <sup>2</sup> )                                |                                         |                                         |                                         |                                           |                                           |                                                   |                                                    |
| Protein                                                    | -                                       | -                                       | -                                       | 45.99                                     | 60.5                                      | 52.22                                             | 41.12                                              |
| Validation                                                 |                                         |                                         |                                         |                                           |                                           |                                                   |                                                    |
| MolProbity score                                           | -                                       | -                                       | -                                       | 1.84                                      | 1.67                                      | 1.72                                              | 1.74                                               |
| Clashscore                                                 | -                                       | -                                       | -                                       | 7.77                                      | 6.57                                      | 5.81                                              | 6.84                                               |
| Poor rotamers (%)                                          | -                                       | -                                       | -                                       | 0                                         | 0                                         | 0                                                 | 0                                                  |
| Ramachandran plot                                          |                                         |                                         |                                         |                                           |                                           |                                                   |                                                    |
| Favored (%)                                                | -                                       | -                                       | -                                       | 93.79                                     | 95.63                                     | 94.06                                             | 94.73                                              |
| Allowed (%)                                                | -                                       | -                                       | -                                       | 6.21                                      | 4.37                                      | 5.94                                              | 5.22                                               |
| Disallowed (%)                                             | -                                       | -                                       | -                                       | 0                                         | 0                                         | 0                                                 | 0.05                                               |
| Cb outliers (%)                                            | -                                       | -                                       | -                                       | 0                                         | 0                                         | 0                                                 | 0                                                  |
| CaBLAM outliers (%)                                        | -                                       | -                                       | -                                       | 3.91                                      | 3.12                                      | 3.11                                              | 3.56                                               |

**Supplementary Table 3. Sequence of 6D10**

| Chain name          | Sequence                                                                                                                       |
|---------------------|--------------------------------------------------------------------------------------------------------------------------------|
| Heavy chain of 6D10 | EVQLQQSGPELARPWASVKISCQAFYTFSNYGMQWVKQSPGQG<br>LEWIGPFYYPGNADTSYNQKFKGKATLTADKSSSTAYMQFSSLTS<br>EDSAVYYCARVVATTDFDYWGQGTTVTVSS |
| Light chain of 6D10 | YIEASQSPSSLAVSVGEKVTMSCKSSQSLLYSSNQKNYLAWFQQ<br>KPGQSPKLLIYWASTRESGVPDRFTGSGSGTDFTLTISSVKAEDL<br>AVYYCQYYSPYTFGGGTKLKIKR       |
